# Supplementary material for: A novel lncRNA promotes myogenesis of bovine skeletal muscle satellite cells via PFN1‐RhoA/Rac1
Source: PubMed Central journal article supplement (PMC8256363; doi:10.1111/jcmm.16427), 2021-05-04

**A**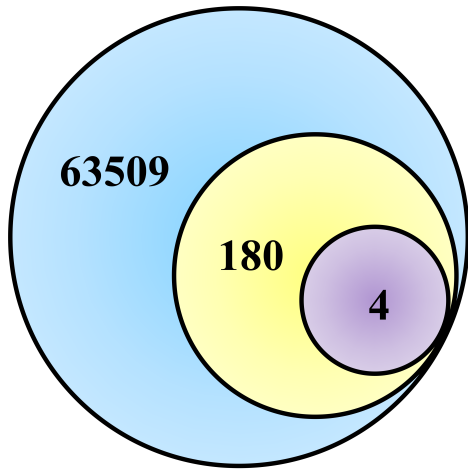

-  Total lncRNAs
-  Co-expressed lncRNAs
-  RPKM > 5

**B**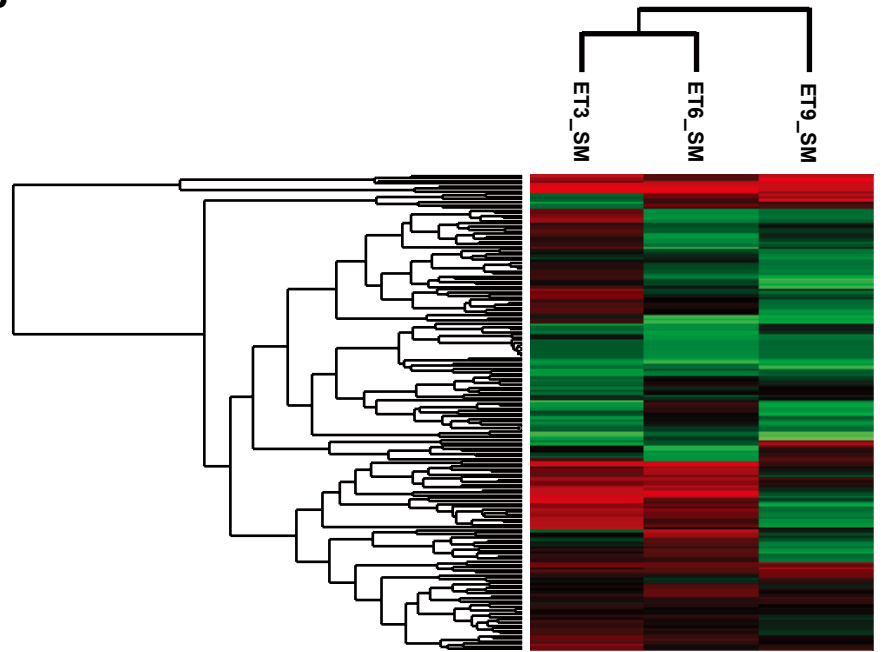

Supplement: JCMM-25-5988-s002.pdf [file JCMM-25-5988-s002.pdf]
