# Supplementary material for: A novel lncRNA promotes myogenesis of bovine skeletal muscle satellite cells via PFN1‐RhoA/Rac1
Source: PubMed Central journal article supplement (PMC8256363; doi:10.1111/jcmm.16427), 2021-05-04

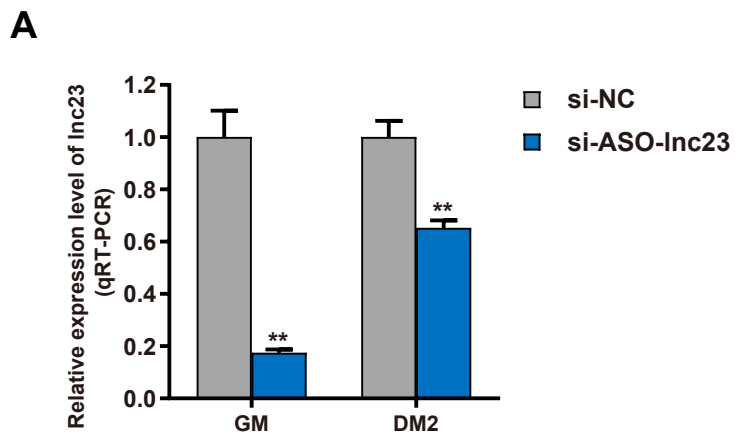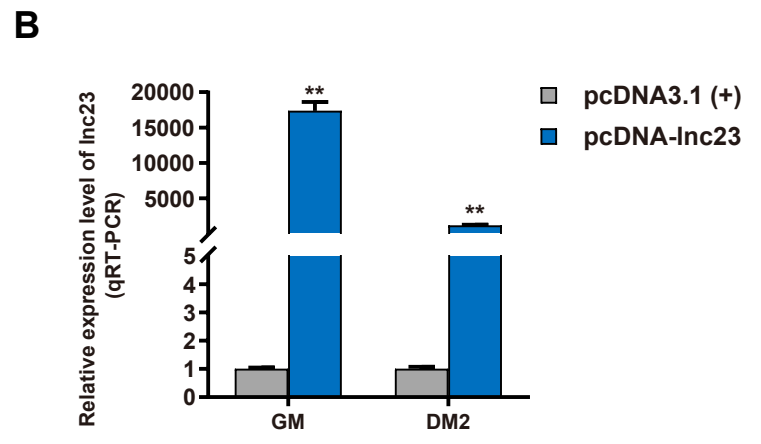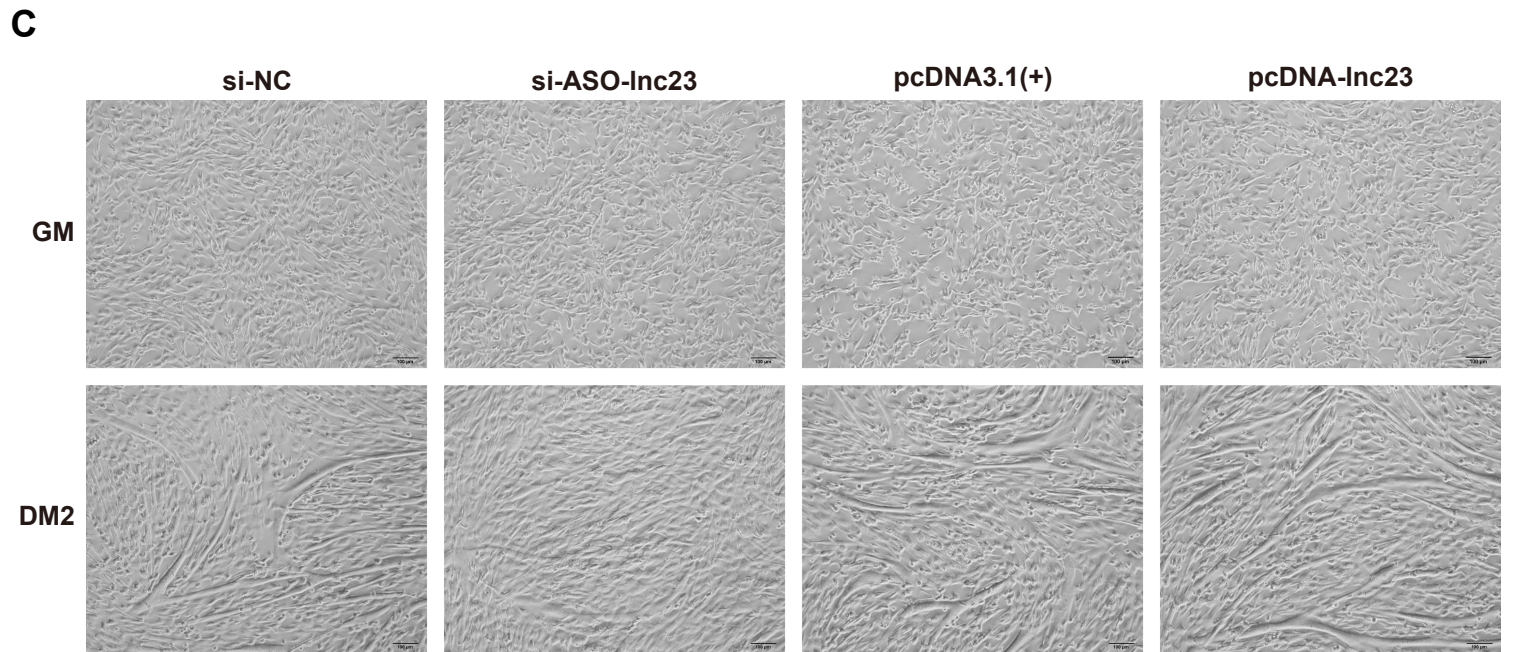

Supplement: JCMM-25-5988-s004.pdf [file JCMM-25-5988-s004.pdf]
